# Supplementary material for: Multiomic Characterization of Meningiomas Informs Cell of Origin and Identifies Immune Dysregulation at the Blood-CSF Barrier
Source: Research Square preprint supplement (doi:10.21203/rs.3.rs-8612817/v1), 2026-01-29
Supplement: Supplementary file 2 [file 7aceb123ec16ee14c59065eb.ai]

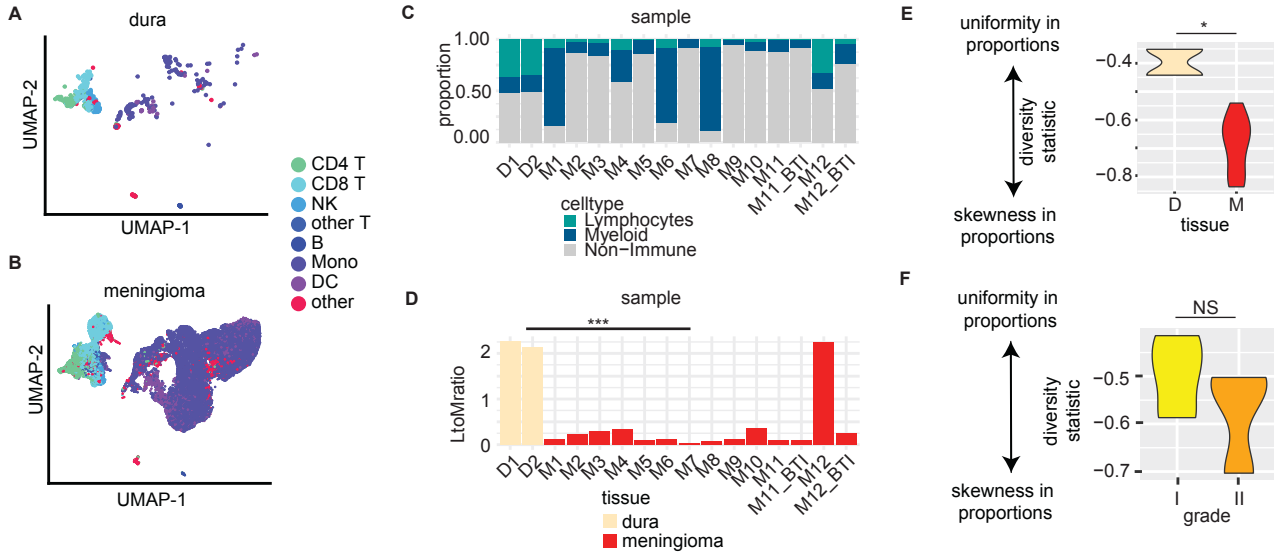

Figure 4: Meningiomas exhibit reduced cell type diversity. A-B UMAP of subclustered PTPRC+ (CD45) immune populations in dura (A) and meningiomas (B). C Barplot of proportion of immune subpopulations in each sample. D Barplot of lymphocyte to myeloid cell ratio in each sample. E-F Violin plot of cell type diversity statistic in dura versus meningioma (E) and in WHO 2016 grade I vs WHO 2016 grade II meningiomas (F). Abbreviations: D: dura, M: meningioma,  $p < 0.001$ :\*\*\*,  $p < 0.05$ : \*, NS: non-significant
