# Supplementary material for: Multiomic Characterization of Meningiomas Informs Cell of Origin and Identifies Immune Dysregulation at the Blood-CSF Barrier
Source: Research Square preprint supplement (doi:10.21203/rs.3.rs-8612817/v1), 2026-01-29
Supplement: Supplementary file 3 [file eff400663d5714ea0da2049e.ai]

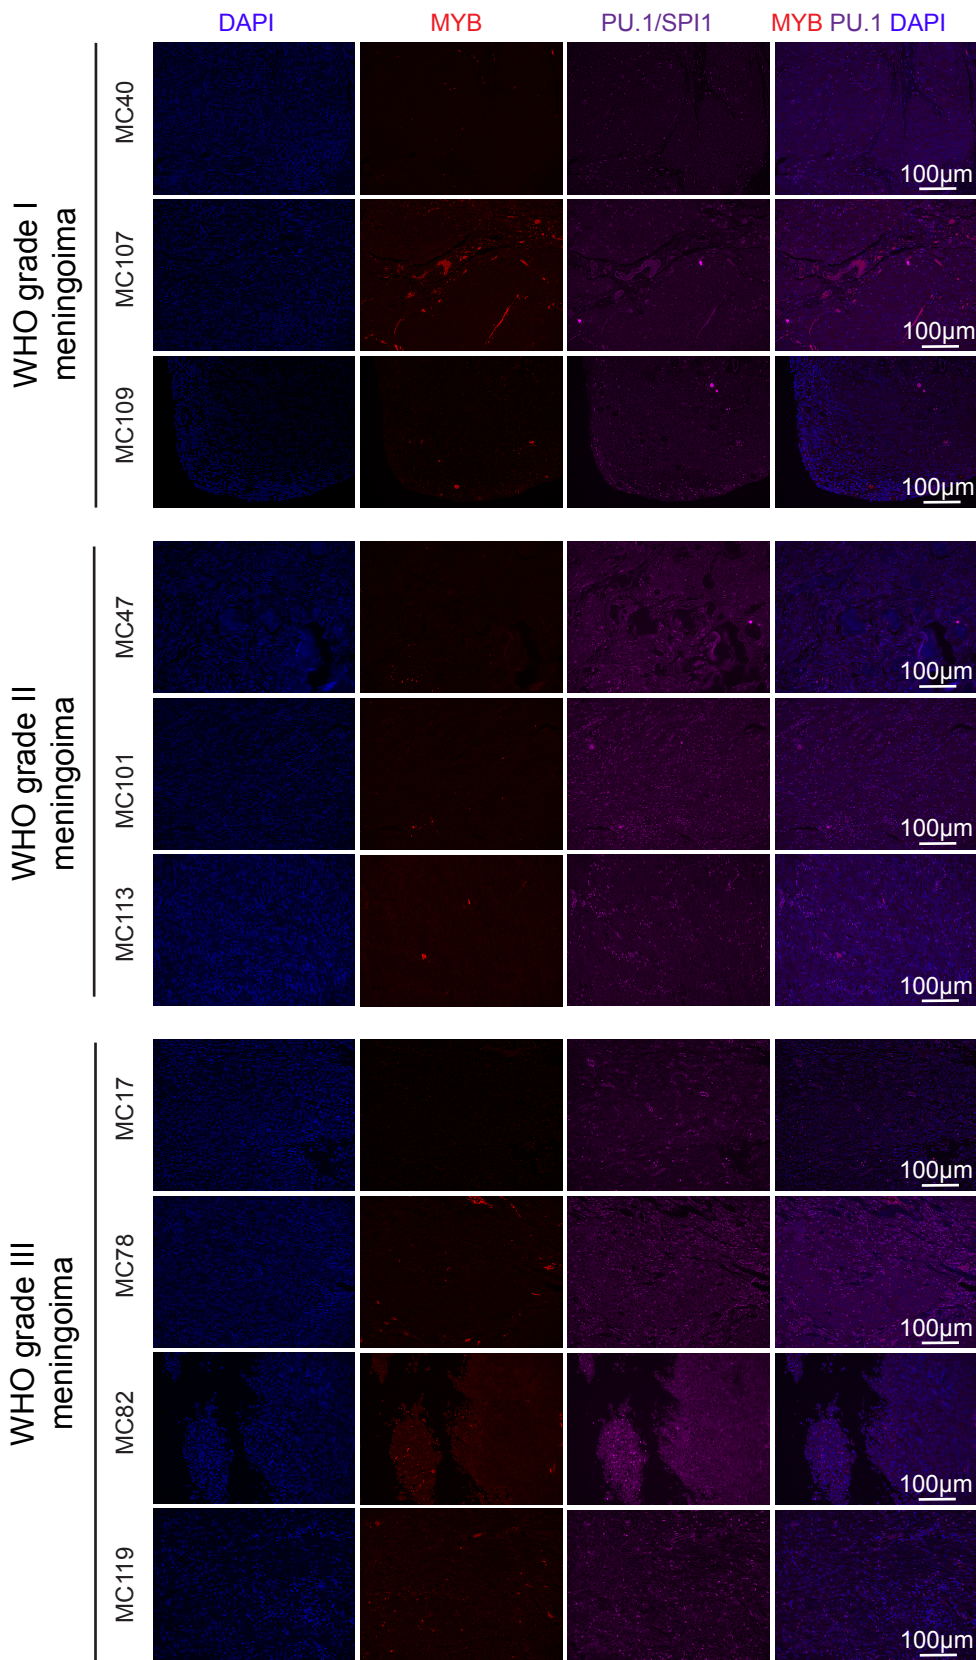

Supplementary Figure 5: Meningiomas have variable expansion of PU.1+ yolk sac-derived tissue resident macrophages with minimal infiltration of MYB+ bone marrow-derived macrophages. Immunostaining of grade I (n=3), grade II (n=3), and grade III (n=4) meningiomas MYB+ macrophages in blood vessels with rare infiltrating MYB+ cells. PU.1+ macrophages are more uniformly distributed. Blue: DAPI; Red: MYB, Far-red/Purple: PU.1/SPI1.
